# Supplementary material
Source: Springer Nature journal article supplement (https://www.springermedizin.de/resource/supplementary/12889_2014_7451_MOESM4_ESM.pdf/9497426)

| #  | District      | Malaria prevalence | Zone               |
|----|---------------|--------------------|--------------------|
|    |               | <b>Range</b>       |                    |
| 1  | Kinondoni     | 0.3 - 3.6%         | Dar es Salaam      |
| 2  | Ruangwa       | 4.0 - 26.0%        | Southern           |
| 3  | Mtwara Urban  | 2.0 - 17.4%        | Southern           |
| 4  | Songea Urban  | 0.8 - 12.3%        | Southern           |
| 5  | Mbozi         | 0 - 4.5%           | Southern Highlands |
| 6  | Iringa Urban  | 0 - 0.4%           | Southern Highlands |
| 7  | Kilosa        | 6.9 - 13%          | Eastern            |
| 8  | Bagamoyo      | 7.4 - 10.2%        | Eastern            |
| 9  | Arusha        | 0%                 | Northern           |
| 10 | Kondoa        | 0.5 - 2.6%         | Central            |
| 11 | Singida Rural | 0 - 0.2%           | Central            |
| 12 | Geita         | 21.0 - 32.9%       | Lake               |
| 13 | Musoma        | 14.6 - 25.6%       | Lake               |
| 14 | Kahama        | 4.4 - 6.8%         | Western            |
| 15 | Kasulu        | 9.9 - 26.1%        | Western            |

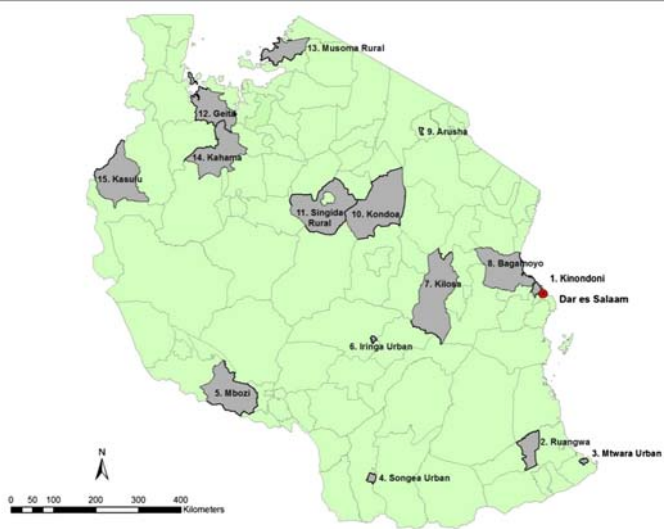

Supplement: MOESM4 [file 9497426]
